# Supplementary material for: Urmia Lake: A promising pool of petroleum hydrocarbon biodegrades
Source: Research Square preprint supplement (doi:10.21203/rs.3.rs-7699662/v1), 2025-09-25
Supplement: Supplementary file 1 [file 3893b147e97ef934f7345b1e.xlsx]

## Sheet: S1 (GC condition)
	GC/MSConditions & Specifications
	Temperature Program
	Parametr	Step 1	Step 2	Step 3	Step 4	Step 5
	Initial Temperature (ºC)	40	---	---	---	---
	Initial Time (min)	1	---	---	---	---
	Program Rate (ºC/min)	3	---	---	---	---
	Final Temperature (ºC)	270	---	---	---	---
	Final Time (min)	10	---	---	---	---
	Split ratio (ml/min)	100	---	---	---	---
	Septum purge (ml/min)	---	---	---	---	---
	Flow rate (ml/min)	1	---	---	---	---
	Instrument Specifications:
	Manufacturer Company: Agilent Technologies
	1. GC System: 7890A
	2. Mass Selective Detector: 5975C VL MSD with Triple-Axis Detector
	3. Ion source: Electron Impact (EI) 70eV
	4. Analyzer: Quadrupole
	5. Column: Rtx 5 MS
	-Length: 30m
	-I.D.: 0.250 mm
	-Film thickness: 25 μm
	6. Data processed by Agilent MSD Chemstation (Rev E.02.02.1413)
	Conditions:
	1. Injection Port Temperature: 250ºC
	2. Ion Source Temperature: 230ºC
	3. Carrier Gas: He 99.999%
	4. Sample Volume: 0.2 μL

## Sheet: S 2 (Images)
Dunaliella salina removal ( 3-μm )					Biomass collection (0.22-μm)					Quality checking of DNA-NanoDrop™

## Sheet: S 3 (Locations)
Location 1		Location 2		Location 3		Location 4		Location 5		Location 6
Atmospheric condition: cloudy		Atmospheric condition: cloudy		Atmospheric condition: cloudy		Atmospheric condition: cloudy		Atmospheric condition: cloudy		Atmospheric condition: cloudy
Depth: 70 cm		Depth: 170 cm		Depth: 225 cm		Depth: 100 cm		Depth: 70 cm		Depth: 70 cm
Water temperature: 10 °C		Water temperature: 10 °C		Water temperature: 10 °C LatLong:		Water temperature: 10 °C		Water temperature: 10 °C		Water temperature: 10 °C
LatLon:45.19786481, 38.20498536		LatLon: 45.40363887, 38.1446445		LatLon: 45.26838351, 38.03817219		LatLon: 45.17341521, 37.93305343		LatLon: 45.29585246, 37.84992919		LatLon:45.36117756, 37.68209706
DMS: 38° 12' 54.68'' N | 45° 17' 38.84'' E		DMS: 38° 7' 14.92'' N | 45° 19' 45.77'' E		DMS: 38° 2' 17.42'' N | 45° 16' 6.18'' E		DMS: 37° 55' 58.99'' N | 45° 10' 24.29'' E		DMS: 37° 53' 17.95'' N | 45° 19' 9.73'' E		DMS: 37° 55' 58.99'' N | 45° 10' 24.29'' E
UTM: 525747.482E 4229731.941N 38S		UTM: 528871.33E 4219270.76N 38S		UTM: 523551.157E 4210084.306N 38S		UTM: 515239.228E 4198401.378N 38S		UTM: 528082.246E 4193472.134N 38S		UTM: 515239.228E 4198401.378N 38S
MGRS: 38SNH 25747 29732		MGRS: 38SNH 28871 19271		MGRS: 38SNH 23551 10084		MGRS: 38SNG 15239 98401		MGRS: 38SNG 28082 93472		MGRS: 38SNG 15239 98401
CRS: EPSG:4326 45.294 38.215		CRS: EPSG:4326 45.329 38.121		CRS: EPSG:4326 45.268 38.038		CRS: EPSG:4326 45.173 37.933		CRS: EPSG:4326 45.319 37.888		CRS: EPSG:4326 45.173 37.933
Record Date: 2020-11-20 11:38:16		Record Date: 2020-11-20 11:09:29		Record Date: 2020-11-20 10:39:08		Record Date: 2020-11-20 10:09:49		Record Date: 2020-11-20 10:09:49		Record Date: 2020-11-20 10:09:49
These tables have been published previously by Kheiri and coworkers.

## Sheet: S 4 (Physico-chemical features)
Physico-chemical features of Lake Urmia and Bushnell Hass-diluted samples
Parameter	Unit	Measuring method	Bushnell Hass medium	Urmia Lake water (27% w/v salinity)	Diluted Urmia Lake water (20% w/v salinity)	Diluted Urmia Lake water (15% w/v salinity)	Diluted Urmia Lake water (10% w/v salinity)	Diluted Urmia Lake water (5% w/v salinity)
EC	μmhos/cm	SM 2510-B		510333
pH		SM 4500-H-B	7	9	8.5	8.1	7.7	7
Turbidity	NTU	SM 2130-B	0.05	25	18.5	13.9	9.3	0.1
TDS	mg/l	SM 2510		331700
Total alkalinity	mg/l CaCO3	SM 2320-B		1339
Total hardness	mg/l CaCO3	SM 2340-C		85867
Sodium (Na+)	mg/l	D6919		92500
Calcium (Ca2+)	mg/l	D6919	7.22	513	382	288	195	101
Magnesium (Mg2+)	mg/l	D6919	40.38	17733	13136	9870	6593	3317
Potassium (K+)	mg/l	SM 3500-K	673.88	4000	3138	2522	1906	1290
Chloride (Cl-)	mg/l	SM 4110-B	45.55	1801103	133421	100077	66733	33390
Sulfate (SO42-)	mg/l	SM 4110-B	159.61	25267	18758	14108	9459	4809
Nitrate (NO3-)	mg/l	SM 4110-B	613.25	14	169	280	391	502
Fluoride (F)	mg/l	SM 4110-B	0	17	13	9	6	3
Iron (Fe)	mg/l	SM 3500Fe-B	17.21	1	5	8	11	14
Lead (Pb)	μg/l	DIN:38406	-	-	-	-	-	-
Copper (Cu)	μg/l	DIN:38406	-	-	-	-	-	-
Cadmium (Cd)	μg/l	DIN:38406	-	-	-	-	-	-
Zinc (Zn)	μg/l	DIN:38406	-	13	10	7	5	2
TOC (Total organic carbon)	μg/l	SM 5310B	<60	<60	<60	<60	<60	<60
SM, Standard Methods for the Examination of Water and Wastewater, 23rd Edition. DIN, German Institute for Standardization.
This table has been published previously by Kheiri and coworkers.

## Sheet: Sheet4
hmmpress alkB.hmm hmmpress cyp450.hmm hmmpress monooxygenase.hmm
hmmsearch --tblout alkB_results.tbl alkB.hmm predicted_proteins.faa
hmmsearch --tblout cyp450_results.tbl cyp450.hmm predicted_proteins.faa
hmmsearch --tblout monooxygenase_results.tbl monooxygenase.hmm predicted_proteins.faa
hmmpress alkB.hmm
hmmsearch --cpu 16 --pfamtblout Pfam-hits.tbl --tblout Pfam-A.tbl Pfam-A.hmm predicted_proteins.faa
Internal pipeline statistics summary for cyp450
-------------------------------------
Query model(s): 1 (462 nodes)
Target sequences: 1733777 (224154182 residues searched)
Passed MSV filter: 34063 (0.0196467); expected 34675.5 (0.02)
Passed bias filter: 29886 (0.0172375); expected 34675.5 (0.02)
Passed Vit filter: 2808 (0.00161959); expected 1733.8 (0.001)
Passed Fwd filter: 605 (0.000348949); expected 17.3 (1e-05)
Initial search space (Z): 1733777 [actual number of targets]
Domain search space (domZ): 592 [number of targets reported over threshold]
# CPU time: 4.26u 0.08s 00:00:04.34 Elapsed: 00:00:01.74
Internal pipeline statistics summary for Alkane 1-monooxygenase.
-------------------------------------
Query model(s): 1 (490 nodes)
Target sequences: 1733777 (224154182 residues searched)
Passed MSV filter: 50889 (0.0293515); expected 34675.5 (0.02)
Passed bias filter: 41743 (0.0240763); expected 34675.5 (0.02)
Passed Vit filter: 3256 (0.00187798); expected 1733.8 (0.001)
Passed Fwd filter: 98 (5.6524e-05); expected 17.3 (1e-05)
Initial search space (Z): 1733777 [actual number of targets]
Domain search space (domZ): 43 [number of targets reported over threshold]
# CPU time: 4.09u 0.12s 00:00:04.21 Elapsed: 00:00:01.62
# Mc/sec: 67513.31
Internal pipeline statistics summary for Ring hydroxylating alpha subunit
-------------------------------------
Query model(s): 1 (208 nodes)
Target sequences: 1733777 (224154182 residues searched)
Passed MSV filter: 39073 (0.0225363); expected 34675.5 (0.02)
Passed bias filter: 28583 (0.016486); expected 34675.5 (0.02)
Passed Vit filter: 2165 (0.00124872); expected 1733.8 (0.001)
Passed Fwd filter: 46 (2.65317e-05); expected 17.3 (1e-05)
Initial search space (Z): 1733777 [actual number of targets]
Domain search space (domZ): 41 [number of targets reported over threshold]
# CPU time: 2.12u 0.11s 00:00:02.23 Elapsed: 00:00:00.87
# Mc/sec: 53377.60
Internal pipeline statistics summary for NtaA-DmoA family FMN-dependent monooxygenase
-------------------------------------
Query model(s): 1 (422 nodes)
Target sequences: 1733777 (224154182 residues searched)
Passed MSV filter: 47803 (0.0275716); expected 34675.5 (0.02)
Passed bias filter: 31473 (0.0181529); expected 34675.5 (0.02)
Passed Vit filter: 2748 (0.00158498); expected 1733.8 (0.001)
Passed Fwd filter: 519 (0.000299346); expected 17.3 (1e-05)
Initial search space (Z): 1733777 [actual number of targets]
Domain search space (domZ): 500 [number of targets reported over threshold]
# CPU time: 4.28u 0.09s 00:00:04.37 Elapsed: 00:00:01.75
# Mc/sec: 53955.00
Internal pipeline statistics summary for Flavin-binding\ monooxygenase
-------------------------------------
Query model(s): 1 (532 nodes)
Target sequences: 1733777 (224154182 residues searched)
Passed MSV filter: 27609 (0.0159242); expected 34675.5 (0.02)
Passed bias filter: 26645 (0.0153682); expected 34675.5 (0.02)
Passed Vit filter: 3225 (0.0018601); expected 1733.8 (0.001)
Passed Fwd filter: 381 (0.000219751); expected 17.3 (1e-05)
Initial search space (Z): 1733777 [actual number of targets]
Domain search space (domZ): 291 [number of targets reported over threshold]
# CPU time: 5.00u 0.10s 00:00:05.09 Elapsed: 00:00:01.97
# Mc/sec: 60290.74
Internal pipeline statistics summary for DOMON
-------------------------------------
Query model(s): 1 (124 nodes)
Target sequences: 1733777 (224154182 residues searched)
Passed MSV filter: 37132 (0.0214168); expected 34675.5 (0.02)
Passed bias filter: 28433 (0.0163995); expected 34675.5 (0.02)
Passed Vit filter: 1899 (0.0010953); expected 1733.8 (0.001)
Passed Fwd filter: 23 (1.32658e-05); expected 17.3 (1e-05)
Initial search space (Z): 1733777 [actual number of targets]
Domain search space (domZ): 11 [number of targets reported over threshold]
# CPU time: 1.70u 0.10s 00:00:01.80 Elapsed: 00:00:00.87
# Mc/sec: 31716.60
